# Supplementary material for: Digitisation of the Natural History Museum’s collection of Dalbergia, Pterocarpus and the subtribe Phaseolinae (Fabaceae, Faboideae)
Source: Biodivers Data J. 2022 Nov 14;10:e94939. doi: 10.3897/BDJ.10.e94939 (PMC9836434; doi:10.3897/BDJ.10.e94939)
Supplement: Supplementary material 1 — Full country list [file bdj-10-e94939-s001.csv]

BingCountry List	No. of records
Afghanistan	0
Albania	0
Algeria	1
American Samoa	0
Andorra	0
Angola	607
Anguilla	0
Antarctica	0
Antigua & Barbuda	12
Argentina	31
Armenia	0
Aruba	0
Australia	108
Austria	0
Azerbaijan	0
Bahamas	8
Bahrain	0
Bangladesh	40
Barbados	12
Belarus	0
Belgium	0
Belize	118
Benin	6
Bermuda	4
Bhutan	41
Bolivia	68
Bonaire	0
Bosnia & Herzegovina	0
Botswana	10
Bouvet Island	0
Brazil	599
British Indian Ocean Territory	0
British Virgin Islands	4
Brunei	0
Bulgaria	0
Burkina Faso	0
Burundi	4
Cape Verde	7
Cambodia	5
Cameroon	68
Canada	0
Cayman Islands	23
Central African Republic	232
Chad	1
Chile	3
China	253
Christmas Island	2
Cocos (Keeling) Islands	0
Colombia	84
Comoros	8
Republic of Congo	1
Congo	340
Cook Islands	0
Costa Rica	97
Côte d’Ivoire	9
Croatia	0
Cuba	47
Curaçao	0
Cyprus	0
Czech Republic	0
Denmark	0
Djibouti	0
Dominica	46
Dominican Republic	14
Ecuador	26
Egypt	17
El Salvador	47
Equatorial Guinea	15
Eritrea	23
Estonia	0
Eswatini	4
Ethiopia	113
Falkland Islands	0
Faroe Islands	0
Fiji	10
Finland	0
France	13
French Guiana	45
French Polynesia	16
French Southern Territories	0
Gabon	68
Gambia	7
Georgia	0
Germany	0
Ghana	26
Gibraltar	0
Greece	0
Greenland	0
Grenada	5
Guadeloupe	2
Guam	3
Guatemala	52
Guernsey	0
Guinea	15
Guinea-Bissau	2
Guyana	66
Haiti	7
Heard Island & McDonald Islands	0
Honduras	102
Hong Kong SAR	22
Hungary	0
Iceland	0
India	699
Indonesia	116
Iran	2
Iraq	5
Ireland	0
Isle of Man	0
Israel	2
Italy	0
Jamaica	84
Jan Mayen	0
Japan	27
Jersey	0
Jordan	1
Kazakhstan	0
Kenya	138
Kiribati	0
Korea	2
Kosovo	0
Kuwait	0
Kyrgyzstan	0
Laos	6
Latvia	0
Lebanon	1
Lesotho	5
Liberia	17
Libya	0
Liechtenstein	0
Lithuania	0
Luxembourg	0
Macao SAR	0
Madagascar	106
Malawi	272
Malaysia	87
Maldives	3
Mali	5
Malta	1
Marshall Islands	0
Martinique	12
Mauritania	0
Mauritius	13
Mayotte	0
Mexico	755
Micronesia	1
Moldova	0
Monaco	0
Mongolia	0
Montenegro	0
Montserrat	10
Morocco	3
Mozambique	178
Myanmar	99
Namibia	32
Nauru	0
Nepal	134
Netherlands	0
New Caledonia	9
New Zealand	0
Nicaragua	60
Niger	7
Nigeria	125
Niue	0
Norfolk Island	0
North Korea	4
North Macedonia	0
Northern Mariana Islands	0
Norway	0
Oman	16
Pakistan	14
Palau	0
Palestinian Authority	2
Panama	87
Papua New Guinea	78
Paraguay	210
Peru	70
Philippines	175
Pitcairn Islands	1
Poland	0
Portugal	8
Puerto Rico	39
Qatar	0
Réunion	0
Romania	0
Russia	0
Rwanda	8
Saba	0
Saint Barthélemy	0
Saint Kitts & Nevis	2
Saint Lucia	7
Saint Martin	0
Saint Pierre & Miquelon	0
Saint Vincent & the Grenadines	13
Samoa	1
San Marino	0
São Tomé & Príncipe	13
Saudi Arabia	17
Senegal	21
Serbia	0
Seychelles	10
Sierra Leone	80
Singapore	19
Sint Eustatius	0
Sint Maarten	0
Slovakia	0
Slovenia	0
Solomon Islands	15
Somalia	11
South Africa	658
South Georgia & the South Sandwich Islands	0
South Sudan	46
Spain	0
Sri Lanka	86
St Helena, Ascension, Tristan da Cunha	1
Sudan	74
Suriname	27
Svalbard	0
Sweden	0
Switzerland	0
Syria	0
Taiwan	31
Tajikistan	0
Tanzania	509
Thailand	536
Timor-Leste	7
Togo	20
Tokelau	0
Tonga	16
Trinidad & Tobago	50
Tunisia	0
Turkey	0
Turkmenistan	0
Turks & Caicos Islands	0
Tuvalu	0
U.S. Outlying Islands	0
U.S. Virgin Islands	8
Uganda	159
Ukraine	0
United Arab Emirates	0
United Kingdom	21
United States	300
Uruguay	5
Uzbekistan	0
Vanuatu	3
Vatican City	0
Venezuela	54
Vietnam	39
Wallis & Futuna	0
Yemen	68
Zambia	203
Zimbabwe	379
